# Supplementary material
Source: PubMed Central journal article supplement (PMC3982322)
Supplement: NIHMS565887-supplement-Sup_Table_1.pdf [file NIHMS565887-supplement-Sup_Table_1.pdf]

**Supplementary Table 1| Available Q-system DNA constructs.**

| Name                                       | Description                                                                                                                         | Addgene ID   |
|--------------------------------------------|-------------------------------------------------------------------------------------------------------------------------------------|--------------|
| <b>QF constructs</b>                       |                                                                                                                                     |              |
| <b>pattB-QF-hsp70</b>                      | <b>QF sequence with hsp70 terminator, in attB PhiC31 integrase vector. This vector is recommended for cloning of QF constructs.</b> | <b>24368</b> |
| pattB-QF                                   | QF ORF with SV40 terminator. Leads to higher expression of QF.                                                                      | 24367        |
| pattB-DSCP-QF                              | QF ORF with DSCP promoter and SV40 terminator.                                                                                      | 24369        |
| pBac-GH146-QF                              | piggyBac vector containing GH146 enhancer element driving QF. Marked by 3xP-DsRed                                                   | 24353        |
| pQF-ET                                     | QF-sv40 enhancer trap.                                                                                                              | 24365        |
| pQF-M2ET                                   | QF-sv40 enhancer trap flanked by LoxM2 and LoxP sites, compatible with RCME.                                                        | 24364        |
| pCMV-QF                                    | Mammalian QF tissue culture expression vector. CMV promoter driving QF.                                                             | 24339        |
| pAC-QF                                     | <i>Drosophila</i> QF tissue culture expression vector. Actin5C promoter driving QF.                                                 | 24338        |
| <b>QS constructs</b>                       |                                                                                                                                     |              |
| <b>pBS-SK-QS</b>                           | <b>QS ORF cloned into pBluescript vector. Recommended for cloning of QS ORF.</b>                                                    | <b>24370</b> |
| ptubP-QS                                   | pCasper4 vector containing tubulin promoter driving QS.                                                                             | 24352        |
| pUASTattB-QS                               | PhiC31 integrase attB vector containing UAS-QS                                                                                      | 24366        |
| CMV-QS                                     | Mammalian QS tissue culture expression vector. CMV promoter driving QS.                                                             | 24340        |
| pAC-QS                                     | <i>Drosophila</i> QS tissue culture expression vector. Actin5C promoter driving QS.                                                 | 24341        |
| <b>QUAS constructs</b>                     |                                                                                                                                     |              |
| <b>pQUAST</b>                              | <b>QUAST P-element transformation vector for cloning of QUAS-geneX constructs.</b>                                                  | <b>24349</b> |
| pQUAST-mCD8-GFP                            | Membrane targeted GFP expression vector.                                                                                            | 24351        |
| pQUAST-mtdT-3xHA                           | Membrane targeted tandem Tomato red fluorescent expression vector with 3x C-terminal HA tag.                                        | 24354        |
| pQUAST-nuclacZ                             | Nuclear targeted beta-galactosidase expression vector.                                                                              | 24356        |
| pQUAST-shibire <sup>ts1</sup>              | Temperature sensitive dynamin expression vector.                                                                                    | 24362        |
| pQUAST-FLPo                                | Mammalian optimized FLPase expression vector.                                                                                       | 24357        |
| pQUAST-DSCP+FLPo                           | Mammalian optimized FLPase expression vector with DSCP promoter.                                                                    | 24358        |
| pCa4B2G-QUAS-FLPo                          | Mammalian optimized QUAS-FLPase flanked by gypsy insulators.                                                                        | 24359        |
| pQUAST-FRT-STOP-FRT-mCD8GFP                | Intersectional vector. QUAS followed by FRT site, two transcriptional terminators, FRT site, and membrane targeted GFP.             | 24361        |
| pQUAST-FRT-STOP-FRT-shibire <sup>ts1</sup> | Intersectional vector. QUAS followed by FRT site, two transcriptional terminators, FRT site, and temperature sensitive dynamin.     | 24363        |
| pQUAS-GG                                   | Mammalian tissue culture expression vector. QUAS driving GFP expression.                                                            | 24336        |
| QUAS-luc2                                  | Tissue culture expression vector. QUAS driving firefly luciferase expression.                                                       | 24337        |

Plasmids, sequence files, and plasmid maps are available at Addgene ([www.addgene.com](http://www.addgene.com)). Annotated plasmid maps are found in Addgene under the "Author's map" section. To find the annotated GenBank sequence files in Addgene, click the "Additional Documents" link. Constructs in **BOLD** are recommended for cloning.
