# Supplementary material
Source: PubMed Central journal article supplement (PMC3982322)
Supplement: NIHMS565887-supplement-Sup_Table_2.pdf [file NIHMS565887-supplement-Sup_Table_2.pdf]

**Supplementary Table 2| Available Q-system transgenic fly stocks.**

| Name                                 | Chromosome                           | Description                                                                                                                                                 | Use                                                                                                                                                                                                                                                       | Bloomington Stock #    |
|--------------------------------------|--------------------------------------|-------------------------------------------------------------------------------------------------------------------------------------------------------------|-----------------------------------------------------------------------------------------------------------------------------------------------------------------------------------------------------------------------------------------------------------|------------------------|
| <b>QUAS reporters</b>                |                                      |                                                                                                                                                             |                                                                                                                                                                                                                                                           |                        |
| QUAS-mCD8-GFP                        | X                                    | Membrane targeted GFP reporter                                                                                                                              | Labels cell bodies and cell membranes. CD8-GFP is the best choice for neuronal labeling.                                                                                                                                                                  | 30001                  |
| QUAS-mCD8-GFP #5J                    | 2 <sup>nd</sup> (23B1)               |                                                                                                                                                             |                                                                                                                                                                                                                                                           | 30002                  |
| QUAS-mCD8-GFP #5B                    | 3 <sup>rd</sup> (86E13)              |                                                                                                                                                             |                                                                                                                                                                                                                                                           | 30003                  |
| QUAS-mtdTomato-3xHA                  | X (4F4)                              | Membrane targeted tandem dimer Tomato reporter expresses a red fluorescent protein with 3 copies of a C-terminal HA tag                                     | Labels cell membranes well. It is excellent for live imaging of larvae and adult animal tissues since the red excitation/emission wavelengths (554 nm/581 nm) penetrate tissues better than the excitation/emission wavelengths for GFP (488 nm / 507 nm) | 30118                  |
| QUAS-mtdTomato-3xHA #14              | 2 <sup>nd</sup> (49C3)               |                                                                                                                                                             |                                                                                                                                                                                                                                                           | 30004                  |
| QUAS-mtdTomato-3xHA #26              | 3 <sup>rd</sup> (94E7)               |                                                                                                                                                             |                                                                                                                                                                                                                                                           | 30005                  |
| QUAS-nucLacZ                         | X                                    | Nuclear localized $\beta$ -galactosidase reporter                                                                                                           | Marks the nuclei of QF expression patterns for identifying the number of cells expressing a QF line.                                                                                                                                                      | Available Upon Request |
| QUAS-nucLacZ #7                      | 2 <sup>nd</sup>                      |                                                                                                                                                             |                                                                                                                                                                                                                                                           | 30006                  |
| QUAS-nucLacZ #44                     | 3 <sup>rd</sup>                      |                                                                                                                                                             |                                                                                                                                                                                                                                                           | 30007                  |
| QUAS-FLPo                            | X                                    | Mammalian codon optimized FLPase <sup>1</sup> reporter.                                                                                                     | In combination with "Flp-out" reporters, is used for generating intersectional expression patterns (see <b>Step 7D</b> )                                                                                                                                  | Available Upon Request |
| QUAS-FLPo #1                         | 2 <sup>nd</sup> (50E6)               |                                                                                                                                                             |                                                                                                                                                                                                                                                           | 30126                  |
| QUAS-FLPo #7                         | 3 <sup>rd</sup> (72D1)               |                                                                                                                                                             |                                                                                                                                                                                                                                                           | 30127                  |
| QUAS-FLPo                            | 3 <sup>rd</sup> (attP2)(68A4)        | Reporter targeted to PhiC31 integrase site.                                                                                                                 |                                                                                                                                                                                                                                                           | 30008                  |
| QUAS>stop>mCD8-GFP #10               | 2 <sup>nd</sup> (50B3)               | Intersectional "Flp-out" reporter that contains FRT ('>') sites surrounding two transcription terminators ('stop') followed by a membrane targeted GFP gene | This "Flp-out" reporter can be used to only label tissues where QF expression patterns overlap with GAL4 expression patterns ( <b>Step 7C; Fig. 5c</b> )                                                                                                  | 30134                  |
| QUAS>stop>mCD8-GFP #5                | 3 <sup>rd</sup> (93D3)               |                                                                                                                                                             |                                                                                                                                                                                                                                                           | 30136                  |
| QUAS>stop>mCD8-GFP #9                | 3 <sup>rd</sup> (68A1)               |                                                                                                                                                             |                                                                                                                                                                                                                                                           | 30135                  |
| QUAS-shibire <sup>ts1</sup> #2       | X (3A6)                              | Reporter the expresses a temperature sensitive variant of the vesicle protein dynamin <sup>2</sup> .                                                        | Mostly used for behavioral analyses, can effectively silence neurotransmission at restrictive temperatures (~29°C to 33°C)                                                                                                                                | 30010                  |
| QUAS-shibire <sup>ts1</sup> #3       | X (3B6)                              |                                                                                                                                                             |                                                                                                                                                                                                                                                           | 30011                  |
| QUAS-shibire <sup>ts1</sup> #8       | 2 <sup>nd</sup> (25B1)               |                                                                                                                                                             |                                                                                                                                                                                                                                                           | 30013                  |
| QUAS-shibire <sup>ts1</sup> #5       | 3 <sup>rd</sup> (88E5)               |                                                                                                                                                             |                                                                                                                                                                                                                                                           | 30012                  |
| QUAS>stop>shibire <sup>ts1</sup> #16 | 3 <sup>rd</sup> (82E7)               | Intersectional 'Flp-out' reporter that expresses temperature sensitive dynamin                                                                              | This "Flp-out" reporter can be used for silencing only neurons that co-express both a GAL4 line and a QF line ( <b>Step 7C</b> ).                                                                                                                         | 30128                  |
| QUAS-dmyc #7                         | 2 <sup>nd</sup>                      | Reporter that expresses the <i>Drosophila myc</i> ( <i>diminutive</i> ) gene                                                                                | Can be used to increase cell growth <sup>3</sup> or induce cell competition <sup>4</sup> of QF expressing cells (Potter and Luo, unpublished results).                                                                                                    | 30009                  |
| QUAS-GAL80                           | X, 2 <sup>nd</sup> , 3 <sup>rd</sup> | Reporter that expresses the GAL4 suppressor GAL80                                                                                                           | Used with a QF line to eliminate overlapping GAL4 expression regions ( <b>Step</b>                                                                                                                                                                        | Available Upon Request |

|                                             |                         |                                                                                                                                                              |                                                                                                                                                             | 7A).                   |
|---------------------------------------------|-------------------------|--------------------------------------------------------------------------------------------------------------------------------------------------------------|-------------------------------------------------------------------------------------------------------------------------------------------------------------|------------------------|
| <b>QF lines:</b>                            |                         |                                                                                                                                                              |                                                                                                                                                             |                        |
| GH146-QF #11                                | 2 <sup>nd</sup> (49E1)  | QF driver that expresses in a majority of projection neurons                                                                                                 | Expression and manipulation of projection neuron populations                                                                                                | 30014                  |
| GH146-QF #53                                | 3 <sup>rd</sup> (68D1)  | QF driver that expresses in a majority of projection neurons                                                                                                 | Expression and manipulation of projection neuron populations                                                                                                | 30015                  |
| ET6-QF                                      | 3 <sup>rd</sup> (68D1)  | QF enhancer trap                                                                                                                                             | Expresses QF in trachea.                                                                                                                                    | 30016                  |
| ET9-QF                                      | 2 <sup>nd</sup> (49E7)  | QF enhancer trap                                                                                                                                             | Broad QF expression in many tissues.                                                                                                                        | 30017                  |
| ET31-QF                                     | 2 <sup>nd</sup> (52E11) | QF enhancer trap                                                                                                                                             | Expresses QF in ensheathing glia.                                                                                                                           | 30018                  |
| ET40-QF                                     | 2 <sup>nd</sup> (49E6)  | QF enhancer trap                                                                                                                                             | Expresses QF in imaginal discs. Can be used for developmental or coupled MARCM studies.                                                                     | 30019                  |
| ET49-QF                                     | 3 <sup>rd</sup> (70C15) | QF enhancer trap                                                                                                                                             | Strong and broad expression in many tissues, including brain. Can be used to test effects of broad <i>QUAS-geneX</i> expression on developmental processes. | 30020                  |
| <b>QS lines:</b>                            |                         |                                                                                                                                                              |                                                                                                                                                             |                        |
| tubP-QS                                     | X                       | Tubulin promoter driving ubiquitous QS expression                                                                                                            | Repression of QF activity in all tissues, which can be reversed by quinic acid treatment.                                                                   | Available Upon Request |
| tubP-QS #L1                                 | 2L (30C5)               |                                                                                                                                                              |                                                                                                                                                             | 30024                  |
| tubP-QS                                     | 2R                      |                                                                                                                                                              |                                                                                                                                                             | Available Upon Request |
| tubP-QS #A                                  | 3L (78C8)               |                                                                                                                                                              |                                                                                                                                                             | 30021                  |
| tubP-QS #9B                                 | 3R (100E1)              |                                                                                                                                                              | Stock used most frequently in Ref <sup>5</sup> .                                                                                                            | 30022                  |
| Pin/ CyO, tubP-QS                           | CyO balancer            | Tubulin promoter driving ubiquitous QS expression inserted onto CyO balancer chromosome                                                                      | Can be used to generate second chromosome balanced stocks which ubiquitously express QS in order to abrogate any negative effects due to a QF expressor.    | Available Upon Request |
| DH/ TM6B, tubP-QS #4A                       | TM6B balancer           | Tubulin promoter driving ubiquitous QS expression inserted onto TM6B balancer chromosome.                                                                    | Can be used to generate third chromosome balanced stocks which ubiquitously express QS in order to abrogate any negative effects due to a QF expressor.     | 30023                  |
| <b>UAS reporters:</b>                       |                         |                                                                                                                                                              |                                                                                                                                                             |                        |
| UAS-QS                                      | 3 <sup>rd</sup> (attP2) | GAL4 inducible QS reporter                                                                                                                                   | Used for intersectional studies where QF activity in subsets of cells can be blocked by GAL4 expression ( <b>Step 7B</b> ).                                 | 30033                  |
| UAS>stop>mCD8-GFP #11                       | 2 <sup>nd</sup>         | Intersectional "Flip-out" reporter that contains FRT ('>') sites surrounding two transcription terminators ('stop') followed by a membrane targeted GFP gene | This "Flip-out" reporter can be used to only label tissues where QF expression patterns overlap with GAL4 expression patterns ( <b>Step 7D</b> )            | 30125                  |
| UAS>stop>mCD8-GFP #14, UAS>stop>mCD8-GFP#18 | 3 <sup>rd</sup>         | Two copies of UAS "Flip-out" reporter recombined on 3 <sup>rd</sup> chromosome.                                                                              | Use for intersectional studies. Two copies of "Flip-out" reporter can increase mCD8-GFP expression levels.                                                  | 30032                  |
| <b>GH146-QF recombinants:</b>               |                         |                                                                                                                                                              |                                                                                                                                                             |                        |

|                                                               |                                   |                                                                                                                          |                                                                                                                                                              |                        |
|---------------------------------------------------------------|-----------------------------------|--------------------------------------------------------------------------------------------------------------------------|--------------------------------------------------------------------------------------------------------------------------------------------------------------|------------------------|
| GH146-QF#53, QUAS-mCD8-GFP                                    | 3 <sup>rd</sup>                   | Recombinant transgenic fly that expresses mCD8-GFP in projection neurons                                                 | Identification of projection neurons.                                                                                                                        | 30038                  |
| GH146-QF#53, QUAS-mtdT-3xHA                                   | 3 <sup>rd</sup>                   | Recombinant transgenic fly that expresses mtdT-3xHA in projection neurons                                                | Identification of projection neurons.                                                                                                                        | 30037                  |
| <b>ET40-QF recombinants:</b>                                  |                                   |                                                                                                                          |                                                                                                                                                              |                        |
| ET40-QF, QUAS-mCD8-GFP                                        | 2 <sup>nd</sup>                   | QF enhancer trap recombined with mCD8-GFP reporter.                                                                      | mCD8-GFP expression in imaginal discs throughout development                                                                                                 | Available Upon Request |
| ET40-QF, QUAS-mtdT-3xHA #14                                   | 2 <sup>nd</sup>                   | QF enhancer trap recombined with mtdT-3xHA reporter                                                                      | Strong QF induced labeling of imaginal discs throughout development.                                                                                         | 30043                  |
| <b>Q-MARCM</b>                                                |                                   |                                                                                                                          |                                                                                                                                                              |                        |
| tubP-QS #3A, 19A <sup>FRT</sup>                               | X (3F9)                           | Tubulin promoter driving ubiquitous QS expression recombined onto 19A FRT chromosome                                     | Can be used for Q MARCM analysis on X.                                                                                                                       | 30129                  |
| tubP-QS #O, 19A <sup>FRT</sup>                                | X (13F1)                          |                                                                                                                          | Can be used for Q MARCM analysis of X                                                                                                                        | 30130                  |
| tubP-QS #4C, 40A <sup>FRT</sup>                               | 2L (35D4)                         | Tubulin promoter driving ubiquitous QS expression recombined onto 40A FRT chromosome                                     | Can be used for Q MARCM analysis of 2L                                                                                                                       | 30035                  |
| tubP-QS #J, 40A <sup>FRT</sup>                                | 2L (35B2)                         |                                                                                                                          | Can be used for Q MARCM analysis of 2L                                                                                                                       | 30131                  |
| G13 <sup>FRT</sup> , tubP-QS #6                               | 2R (47A7)                         | Tubulin promoter driving ubiquitous QS expression recombined onto G13 FRT chromosome                                     | Can be used for Q MARCM analysis of 2R                                                                                                                       | 30132                  |
| G13 <sup>FRT</sup> , tubP-QS #5A                              | 2R (59F1)                         |                                                                                                                          | Can be used for Q MARCM analysis of 2R                                                                                                                       | 30133                  |
| tubP-QS #F2, 80B <sup>FRT</sup>                               | 3L (77B9)                         | Tubulin promoter driving ubiquitous QS expression recombined onto 80B FRT chromosome                                     | Can be used for Q MARCM analysis of 3L                                                                                                                       | 30537                  |
| 82B <sup>FRT</sup> , tubP-QS#9B                               | 3R (100E1)                        | Tubulin promoter driving ubiquitous QS expression recombined onto 82B FRT chromosome                                     | Can be used for Q MARCM analysis of 3R. This stock was most frequently used in ref <sup>5</sup> .                                                            | 30034                  |
| 82B <sup>FRT</sup> , tubP-QS#21                               | 3R (95A7)                         |                                                                                                                          | Can be used for Q MARCM analysis on 2R.                                                                                                                      | 30117                  |
| GH146-QF#53, 82B <sup>FRT</sup> , tubP-QS#9B                  | 3 <sup>rd</sup>                   | Recombinant stock with GH146-QF on 3L and FRT and tubP-QS on 3R                                                          | Q MARCM stock for generating MARCM clones of projection neurons                                                                                              | 30039                  |
| y, w; ET40-QF, QUAS-mtdT-3xHA; 82B <sup>FRT</sup> , tubP-QS#9 | 2 <sup>nd</sup> , 3 <sup>rd</sup> | Recombinant stock with ET40-QF recombined to QUAS reporter on the 2 <sup>nd</sup> chromosome, and FRT and tubP-QS on 3R. | Q MARCM stock for generating MARCM clones in imaginal discs.                                                                                                 | 30042                  |
| hsFLP1, QUAS-mtdT-3xHA, UAS-mCD8-GFP                          | X                                 | Recombinant stock combining QF and GAL4 reporters with heat shock inducible FLPase expression.                           | Q MARCM stock for heat shock inducible expression of FLPase to generate mitotic clones which can be detected by QF reporter (red) and GAL4 reporter (green). | 30118                  |
| <b>GAL4 MARCM</b>                                             |                                   |                                                                                                                          |                                                                                                                                                              |                        |
| tubP-GAL4, 82B <sup>FRT</sup> /TM6B                           | 3 <sup>rd</sup> (79A2)            | Recombinant between ubiquitous GAL4 driver line on 3L (79A2) with FRT on 3R (82B2)                                       | Ubiquitous GAL4 driver tightly linked to 3R 82B FRT chromosome. Can be used to generate MARCM stocks.                                                        | 30029                  |
| tubP-GAL4, 82B <sup>FRT</sup> , tubP-GAL80/TM6B               | 3 <sup>rd</sup>                   | Recombinant between ubiquitous GAL4 driver on 3L and FRT and ubiquitous GAL80 driver on 3R                               | MARCM ready stock for labeling of clones in any tissue.                                                                                                      | 30036                  |
| UAS-mCD8-GFP, QUAS-                                           | X                                 | Recombinant between QF                                                                                                   | Can be used for reporting                                                                                                                                    | Available              |

|                                  |                 |                                                                      |                                                                                                                                  |              |
|----------------------------------|-----------------|----------------------------------------------------------------------|----------------------------------------------------------------------------------------------------------------------------------|--------------|
| mtdT-3xHA; Pin/CyO               |                 | (red) and GAL4 (green) reporters.                                    | expression of both QF and GAL4 drivers.                                                                                          | Upon Request |
| QUAS-mCD8-GFP#5B, tubP-GAL4/TM6B | 3 <sup>rd</sup> | QUAS-GFP reporter recombined with ubiquitously expressed GAL4 driver | Can be used for ubiquitously expressing <i>UAS-geneX</i> effector and visualizing effects on <i>promoter-QF</i> labeled tissues. | 30031        |

For additional MARCM reagents, see ref. 6.

1. Raymond, C.S. & Soriano, P. High-efficiency FLP and PhiC31 site-specific recombination in mammalian cells. *PLoS ONE* **2**, e162 (2007).
2. Kitamoto, T. Conditional modification of behavior in *Drosophila* by targeted expression of a temperature-sensitive shibire allele in defined neurons. *J Neurobiol* **47**, 81-92 (2001).
3. Johnston, L.A., Prober, D.A., Edgar, B.A., Eisenman, R.N. & Gallant, P. *Drosophila myc* regulates cellular growth during development. *Cell* **98**, 779-790 (1999).
4. Moreno, E. & Basler, K. dMyc transforms cells into super-competitors. *Cell* **117**, 117-129 (2004).
5. Potter, C.J., Tasic, B., Russler, E.V., Liang, L. & Luo, L. The Q system: a repressible binary system for transgene expression, lineage tracing, and mosaic analysis. *Cell* **141**, 536-548 (2010).
6. Wu, J.S. & Luo, L. A protocol for mosaic analysis with a repressible cell marker (MARCM) in *Drosophila*. *Nat Protoc* **1**, 2583-2589 (2006).
